# Supplementary material
Source: publisher site journal article supplement (https://www.dovepress.com/article/supplementary_file/550021/550021%20Revised%20Figure%20S1.docx)
Supplement: Supplementary file 1 [file 550021%20Revised%20Figure%20S1.docx]

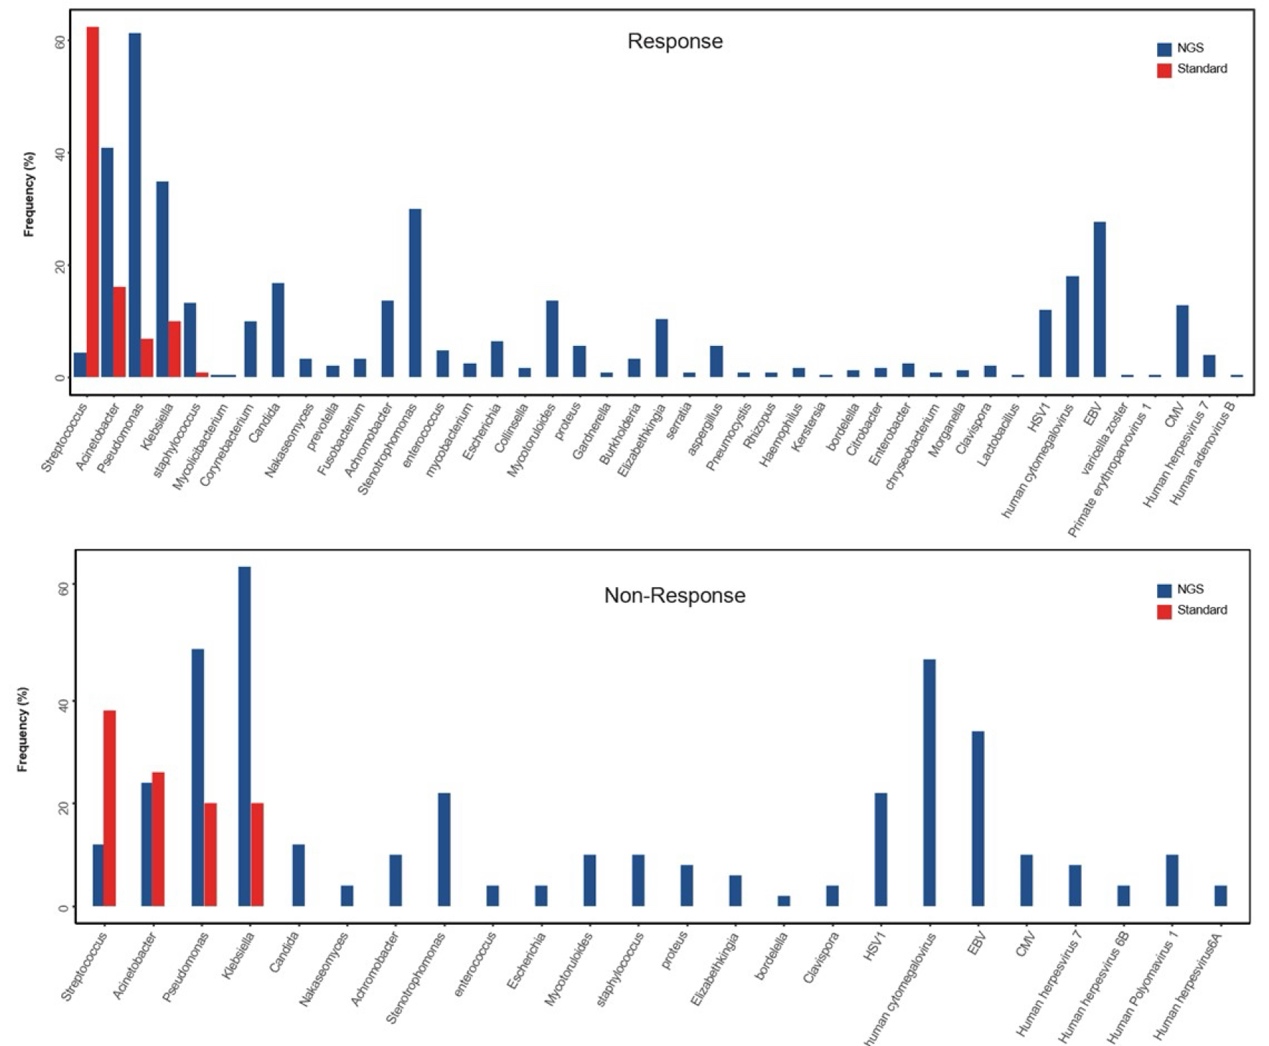


**Figure S1**: **Distribution of Pathogens Detected by mNGS and Standard Methods.** mNGS achieved an overall pathogen detection rate of 92%, significantly outperforming traditional culture methods, which detected pathogens in 72% of the cases. The Venn diagram in this figure highlights the overlap between the two methods, showing that mNGS detected 20% more pathogens that were missed by culture, particularly in non-responder patients. Non-responders, who failed to improve with standard antibiotic therapy, had a higher incidence of difficult-to-culture pathogens like Aspergillus and Pseudomonas, which were often only identified by mNGS.
